# Supplementary material
Source: Royal Society of Chemistry journal article supplement (doi:10.1039/d6ta01149g)
Supplement: d6ta01149g3.pdf [file d6ta01149g3.pdf]

## Supporting Information

### Photovoltaic-Assisted Water Oxidation on MoCoO<sub>x</sub>-Coupled Multi-Element-Doped BiVO<sub>4</sub> Photoanode Enabling 6.4% Unbiased Solar-to-Hydrogen Efficiency under Visible Light

Aditya Raj,<sup>1</sup> Munmun Majumder,<sup>1</sup> Arjun P B,<sup>2</sup> Dipanjan Maity,<sup>3</sup> Mukhesh K. Ganesha,<sup>4</sup> Ashutosh K. Singh,<sup>4,5,6</sup> Debasis De,<sup>2,\*</sup> and Gobinda Gopal Khan<sup>1,\*</sup>

<sup>1</sup> Department of Material Science and Engineering, Tripura University (A Central University), Suryamaninagar, Agartala, Tripura 799 022, India

<sup>2</sup> Rajiv Gandhi Institute of Petroleum Technology Bengaluru Campus, Kambalipura, Sulibele Hobli, Hosakote, Bengaluru 562 165, Karnataka, India

<sup>3</sup> Chemistry and Physics of Materials Unit, Jawaharlal Nehru Centre for Advanced Scientific Research, Jakkur, Bengaluru 560 064, India

<sup>4</sup> Centre for Nano and Soft Matter Sciences, Bangalore, Karnataka, 562162 India

<sup>5</sup> Academy of Scientific and Innovative Research (AcSIR), Ghaziabad- 201002, India.

<sup>6</sup> Manipal Academy of Higher Education, Manipal, Karnataka, 576104, India

*Corresponding author e-mail:* D. De: debasisd@rgipt.ac.in, debasis.ju@gmail.com, G G Khan: gobinda.gk@gmail.com, gobindakhan@tripurauniv.ac.in

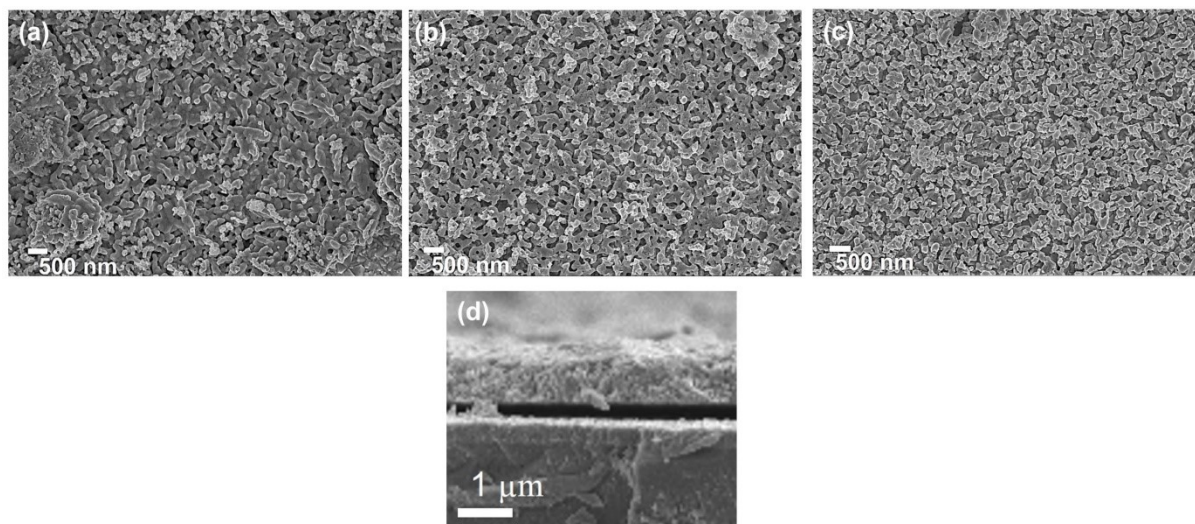

**Figure S1.** Low magnification FESEM images of (a) BiVO<sub>4</sub>, (b) TiWP-BiVO<sub>4</sub>, and (c) MoCoO<sub>x</sub>/TiWP-BiVO<sub>4</sub> samples. (d) Cross-sectional FESEM of the optimal MoCoO<sub>x</sub>/TiWP-BiVO<sub>4</sub> photoanode.

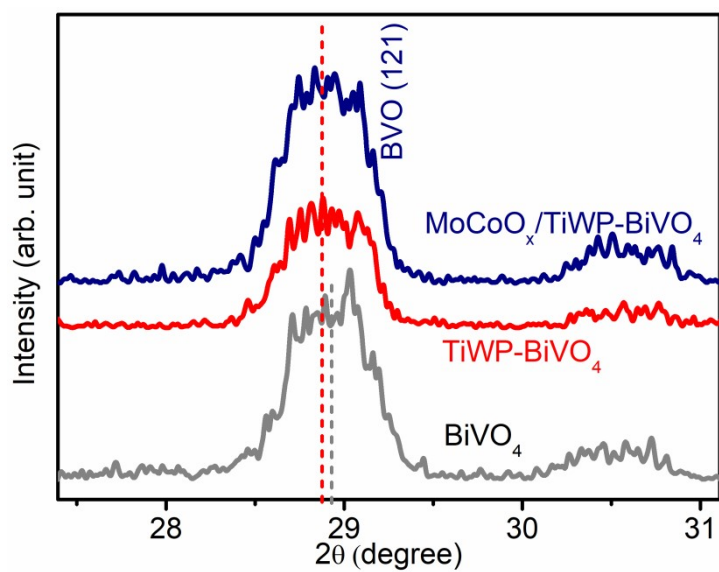

**Figure S2.** Magnified XRD patterns of the samples showing (121) crystallographic plane.

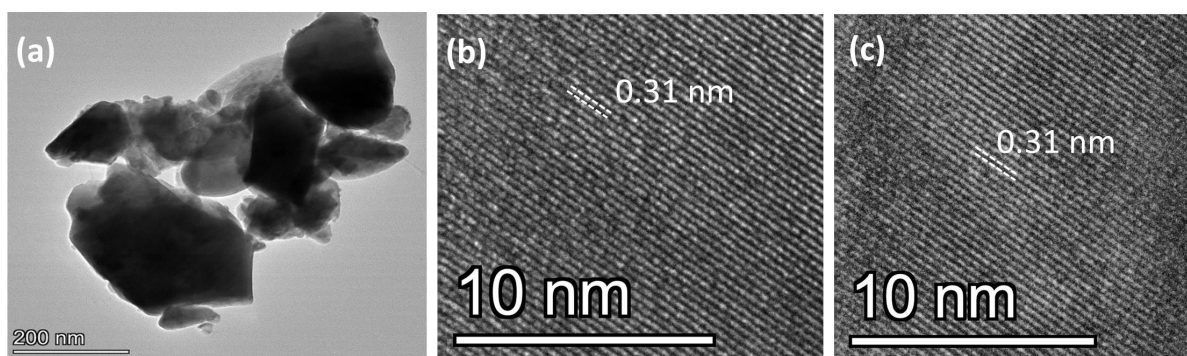

**Figure S3.** Low magnification TEM image of (a)  $\text{MoCoO}_x/\text{TiWP-BiVO}_4$  sample. HRTEM images of (b)  $\text{BiVO}_4$  and (c)  $\text{TiWP-BiVO}_4$  photoanodes.

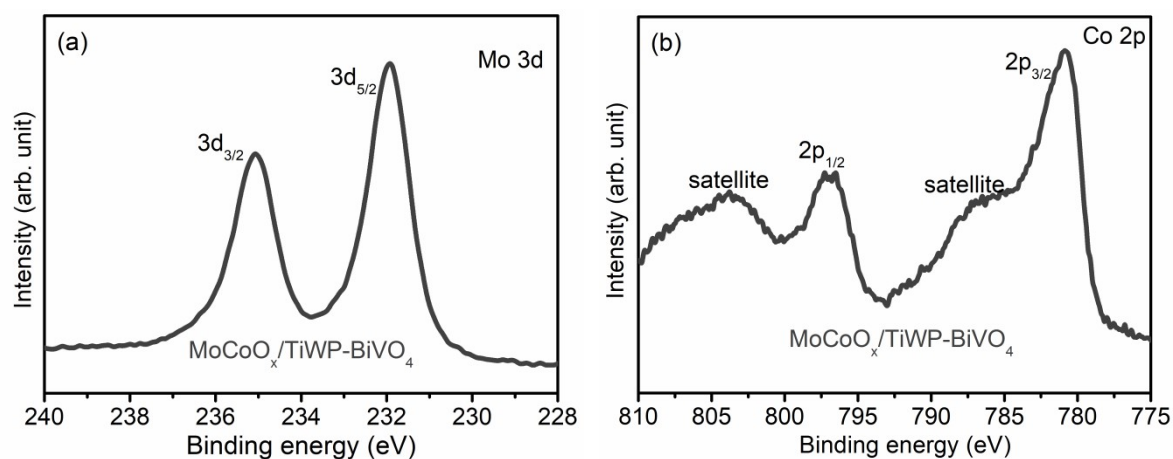

**Figure S4.** XPS spectrum of (a) Mo 3d and (b) Co 2p for  $\text{MoCoO}_x/\text{TiWP-BiVO}_4$  sample.

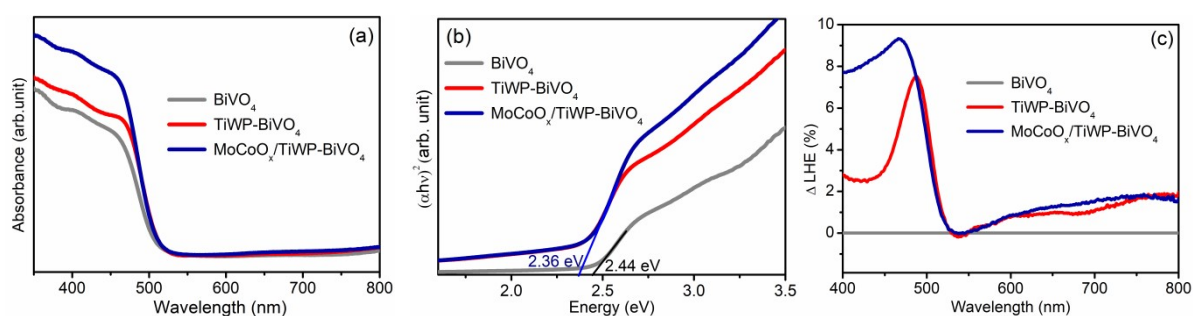

**Figure S5.** (a) UV-vis absorption spectra, (b) Kubelka-Munk plots, and (c)  $\Delta\text{LHE}\%$  plots for the samples.

**Table S1:** Information regarding synthesis of the best PEC performing (optimal) Ti, W, and P-doped  $\text{BiVO}_4$  photoanodes:

| Sample Name                           | Basic solution used                                        | Amount of $\text{TiCl}_3$ solution added | Amount of Sodium tungstate dehydrate added | Amount of triethyl phosphate added | Photocurrent density @1.23 $V_{\text{RHE}}$ ( $\text{mA}/\text{cm}^2$ ) |
|---------------------------------------|------------------------------------------------------------|------------------------------------------|--------------------------------------------|------------------------------------|-------------------------------------------------------------------------|
| Pure $\text{BiVO}_4$                  | 0.2 M $\text{VO}(\text{acac})_2$ solution in 20 mL of DMSO | -                                        | -                                          | -                                  | 1.05                                                                    |
| Ti ( $5\mu\text{L}$ ) $\text{BiVO}_4$ | 0.2 M $\text{VO}(\text{acac})_2$ solution in 20 mL of DMSO | 5 $\mu\text{L}$                          | -                                          | -                                  | 3                                                                       |

|                                                                                    |                                                             |                             |               |            |            |
|------------------------------------------------------------------------------------|-------------------------------------------------------------|-----------------------------|---------------|------------|------------|
| <b>Ti (10<math>\mu</math>L) - BiVO<sub>4</sub></b><br><b>(Ti-BiVO<sub>4</sub>)</b> | <b>0.2 M VO(acac)<sub>2</sub> solution in 20 mL of DMSO</b> | <b>10 <math>\mu</math>L</b> | -             | -          | <b>3.3</b> |
| Ti (15 $\mu$ L)-BiVO <sub>4</sub>                                                  | 0.2 M VO(acac) <sub>2</sub> solution in 20 mL of DMSO       | 15 $\mu$ L                  | -             | -          | 2.8        |
| W (5.2 mM)-BiVO <sub>4</sub>                                                       | 0.2 M VO(acac) <sub>2</sub> solution in 20 mL of DMSO       | -                           | 5.2 mM        | -          | 1.7        |
| <b>W (7.2mM)-BiVO<sub>4</sub></b><br><b>(W-BiVO<sub>4</sub>)</b>                   | <b>0.2 M VO(acac)<sub>2</sub> solution in 20 mL of DMSO</b> | -                           | <b>7.2 mM</b> | -          | <b>1.8</b> |
| W(9.2mM)-BiVO <sub>4</sub>                                                         | 0.2 M VO(acac) <sub>2</sub> solution in 20 mL of DMSO       | -                           | 9.2 mM        | -          | 1.6        |
| P(5 $\mu$ L)-BiVO <sub>4</sub>                                                     | 0.2 M VO(acac) <sub>2</sub> solution in 20 mL of DMSO       | -                           | --            | 5 $\mu$ L  | 2.8        |
| <b>P (10<math>\mu</math>L)-BiVO<sub>4</sub></b><br><b>(P-BiVO<sub>4</sub>)</b>     | 0.2 M VO(acac) <sub>2</sub> solution in 20 mL of DMSO       | -                           | --            | 10 $\mu$ L | <b>3</b>   |
| P (15 $\mu$ L)-BiVO <sub>4</sub>                                                   | 0.2 M VO(acac) <sub>2</sub> solution in 20 mL of DMSO       | -                           | --            | 15 $\mu$ L | 2.9        |
| TiP (5 $\mu$ L) - BiVO <sub>4</sub>                                                | 0.2 M VO(acac) <sub>2</sub> solution in 20 mL of DMSO       | 10 $\mu$ L                  | --            | 5 $\mu$ L  | 3.6        |

|                                                                                         |                                                       |            |        |            |             |
|-----------------------------------------------------------------------------------------|-------------------------------------------------------|------------|--------|------------|-------------|
| <b>TiP (10 <math>\mu</math>L) - BiVO<sub>4</sub></b><br><b>(TiP-BiVO<sub>4</sub>)</b>   | 0.2 M VO(acac) <sub>2</sub> solution in 20 mL of DMSO | 10 $\mu$ L | --     | 10 $\mu$ L | <b>3.7</b>  |
| TiP (15 $\mu$ L) - BiVO <sub>4</sub>                                                    | 0.2 M VO(acac) <sub>2</sub> solution in 20 mL of DMSO | 10 $\mu$ L | --     | 15 $\mu$ L | 3.5         |
| TiW(5.2 mM)-BiVO <sub>4</sub>                                                           | 0.2 M VO(acac) <sub>2</sub> solution in 20 mL of DMSO | 10 $\mu$ L | 5.2 mM | -          | 3.7         |
| <b>TiW (7.5 mM)-BiVO<sub>4</sub></b><br><b>(TiW- BiVO<sub>4</sub>)</b>                  | 0.2 M VO(acac) <sub>2</sub> solution in 20 mL of DMSO | 10 $\mu$ L | 7.5 mM | -          | <b>3.9</b>  |
| TiW (9.2 mM)-BiVO <sub>4</sub>                                                          | 0.2 M VO(acac) <sub>2</sub> solution in 20 mL of DMSO | 10 $\mu$ L | 9.2 mM | -          | 3.6         |
| TiWP (5 $\mu$ L)-BiVO <sub>4</sub>                                                      | 0.2 M VO(acac) <sub>2</sub> solution in 20 mL of DMSO | 10 $\mu$ L | 7.5 mM | 5 $\mu$ L  | 4.21        |
| <b>TiWP (10 <math>\mu</math>L)- BiVO<sub>4</sub></b><br><b>(TiWP- BiVO<sub>4</sub>)</b> | 0.2 M VO(acac) <sub>2</sub> solution in 20 mL of DMSO | 10 $\mu$ L | 7.5 mM | 10 $\mu$ L | <b>4.37</b> |
| TiWP (15 $\mu$ L)- BiVO <sub>4</sub>                                                    | 0.2 M VO(acac) <sub>2</sub> solution in 20 mL of DMSO | 10 $\mu$ L | 7.5 mM | 15 $\mu$ L | 4.02        |

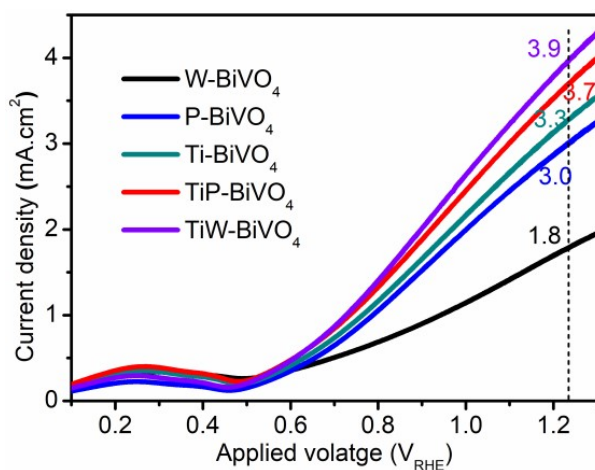

**Figure S6.** LSV profiles of the different elements (W, Ti, and P) doped optimized  $\text{BiVO}_4$  samples, which exhibited the best PEC performance.

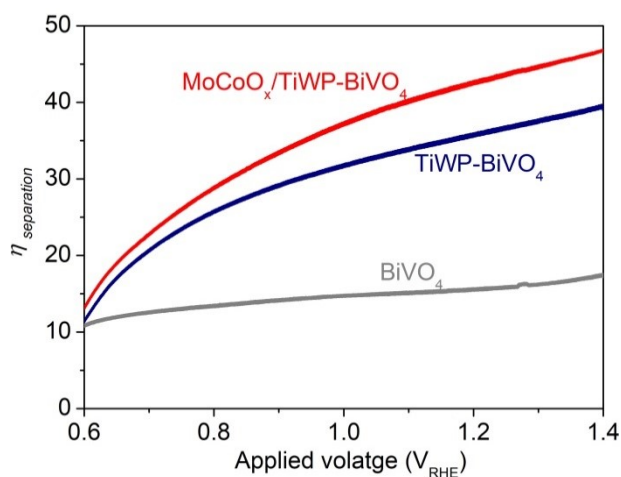

**Figure S7.** Charge-separation efficiency vs. voltage plots for the as-prepared photoanodes.

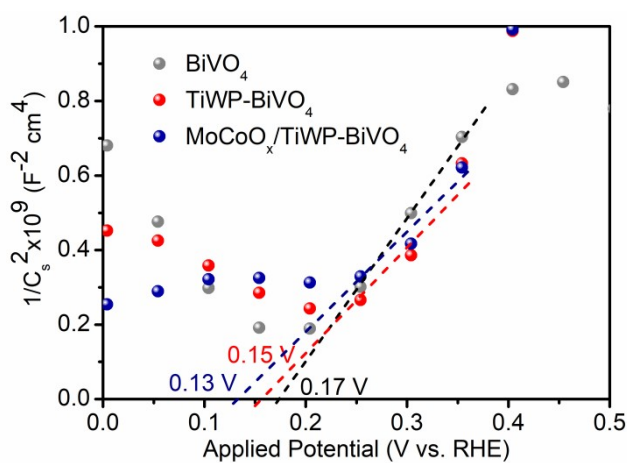

**Figure S8.** Mott-Schottky plots of the photoanodes at a low potential window.

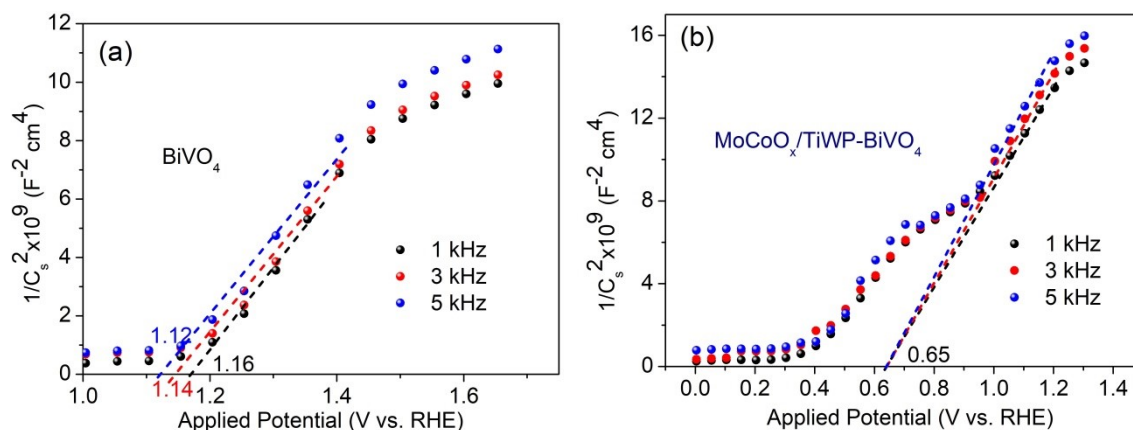

**Figure S9.** Frequency–dependent Mott–Schottky plots of the photoanodes.

The MS plots recorded over a range of frequencies (1, 3, and 5 kHz) reveal pronounced frequency dispersion in pristine  $\text{BiVO}_4$  relative to  $\text{MoCoO}_x/\text{TiWP-BiVO}_4$ . For the pristine  $\text{BiVO}_4$  photoanode, pronounced frequency dispersion in both the slope and the flat-band potential is observed, indicating substantial surface-state capacitance and Fermi-level pinning. In contrast, the  $\text{MoCoO}_x$ -modified  $\text{TiWP-BiVO}_4$  electrode exhibits significantly reduced frequency dependence, demonstrating effective suppression of surface states. It is evident that  $\text{MoCoO}_x$  modification de-pins the Fermi level and improves the band bending.

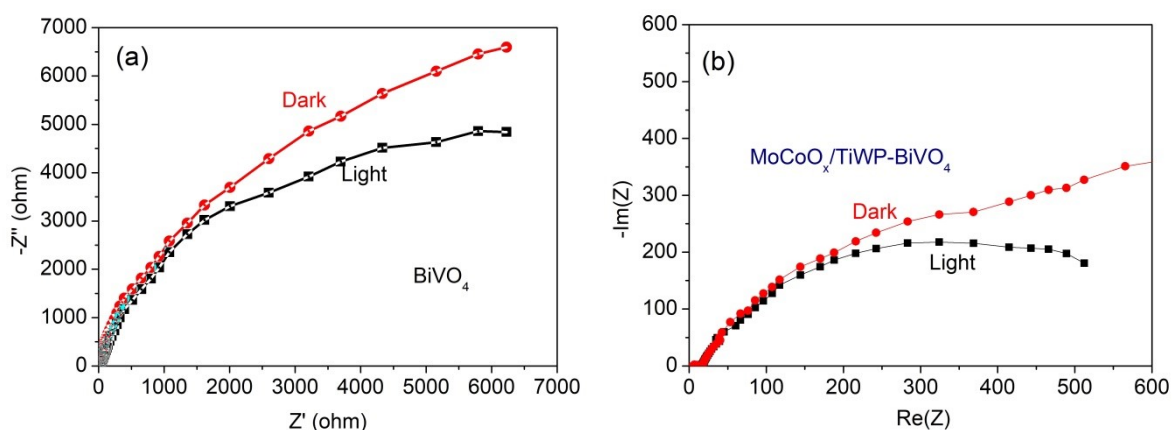

**Figure S10.** EIS spectra obtained at  $1.23 V_{\text{RHE}}$  in the dark and under illumination.

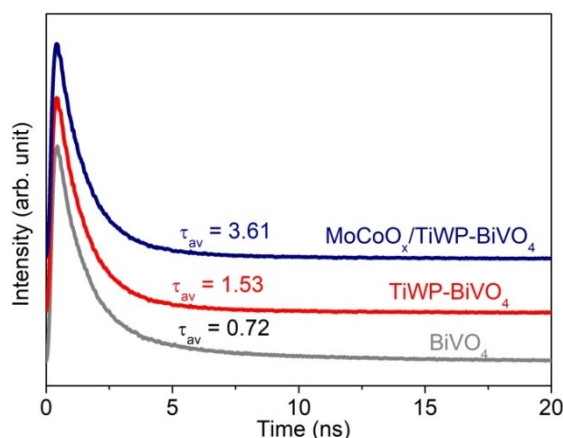

**Figure S11.** Time-resolved photoluminescence decay curves of the photoanodes.

**Table S2.** Fitted parameters of PEIS Nyquist plots (recorded at  $V = 1.23 V_{\text{RHE}}$ ) for the photoanodes.

| Photoanode                          | $R_s$ ( $\Omega$ ) | $R_{ct}$ ( $\Omega$ ) |
|-------------------------------------|--------------------|-----------------------|
| $\text{BiVO}_4$                     | 12.27              | 1027.4                |
| TiWP- $\text{BiVO}_4$               | 10.87              | 96.51                 |
| $\text{MoCoO}_x/\text{TiWP-BiVO}_4$ | 9.64               | 64.42                 |

**Table S3.**  $R_{ct}$  ( $\Omega$ ) values of the TiWP- $\text{BiVO}_4$  and  $\text{MoCoO}_x/\text{TiWP-BiVO}_4$  photoanode recorded at different applied potentials.

| $V_{\text{RHE}}$ (V) | $R_{ct}$ ( $\Omega$ ) |                                     |
|----------------------|-----------------------|-------------------------------------|
|                      | TiWP- $\text{BiVO}_4$ | $\text{MoCoO}_x/\text{TiWP-BiVO}_4$ |
| 1.23                 | 96.51                 | 64.42                               |
| 0.9                  | 112.10                | 79.21                               |
| 0.6                  | 129.62                | 91.34                               |

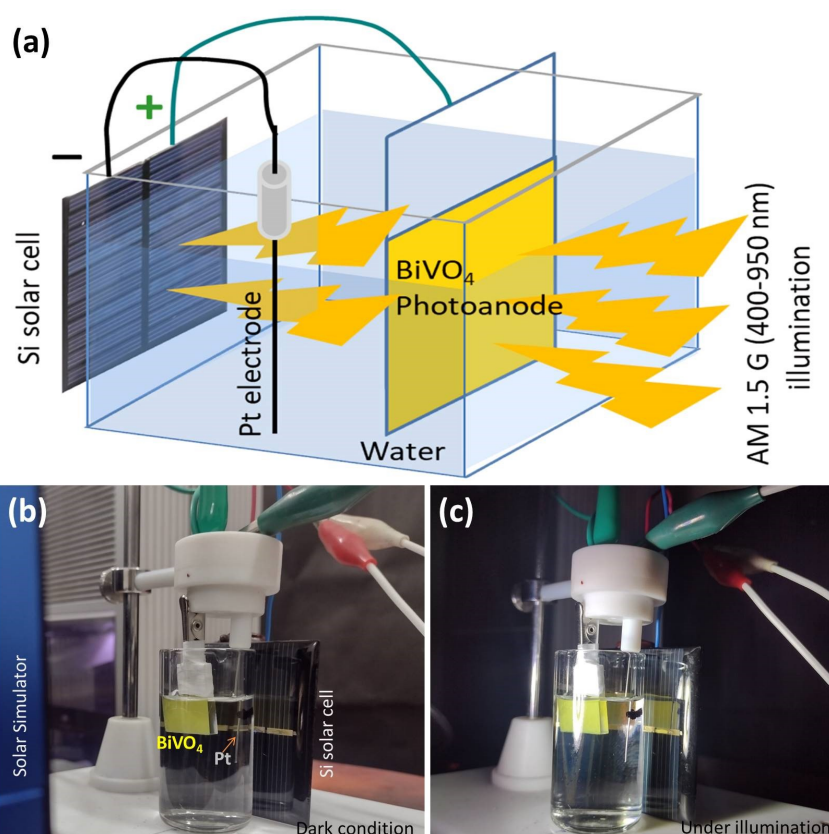

**Figure S12.** The PV-PEC tandem cell setup with  $\text{MoCoO}_x/\text{TiWP-BiVO}_4$  photoanode and Si solar cell: (a) schematic diagram, photograph of the cell setup under dark (b) and light illumination (c) conditions.

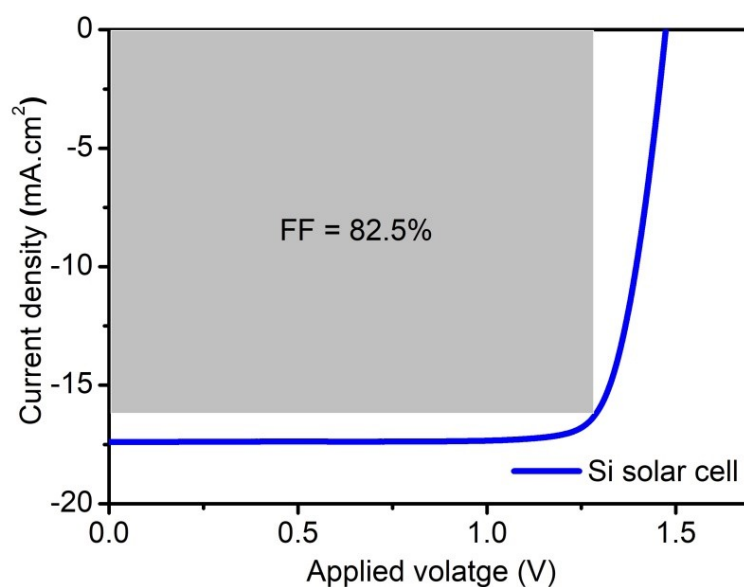

**Figure S13.** J-V curve of the commercial Si solar cell under AM 1.5 G radiation.

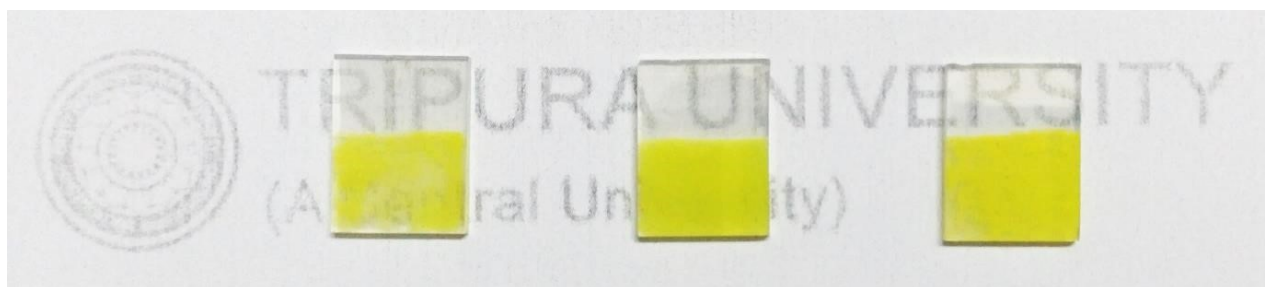

**Figure S14.** Photographs of the as-prepared BiVO<sub>4</sub>, TiWP-BiVO<sub>4</sub>, and MoCoO<sub>x</sub>/TiWP-BiVO<sub>4</sub> photoanodes (left to right) after PEC studies.

**Table S4.** Comparison of the performance of different doped BiVO<sub>4</sub> photoanodes coupled with Co-based OECs.

| Photoanode                                                        | Photocurrent density (mA cm <sup>-2</sup> ) at 1.23 V <sub>RHE</sub> (pH value) | Onset potential (V <sub>RHE</sub> ) | Light source                                                  | ABPE(%) | STH(%) |
|-------------------------------------------------------------------|---------------------------------------------------------------------------------|-------------------------------------|---------------------------------------------------------------|---------|--------|
| MoCoO <sub>x</sub> /TiWP-BiVO <sub>4</sub> <sup>[This work]</sup> | 4.75 (pH 7)                                                                     | 0.4                                 | AM 1.5 G, 100 mW. cm <sup>-2</sup> visible light (400–950 nm) | 1.2     | 6.4%   |
| Co-Pi/N-BiVO <sub>4</sub> <sup>1</sup>                            | 3.7 (pH 7)                                                                      | 0.4                                 | AM 1.5G, 100 mW cm <sup>-2</sup>                              | 1.16    | 0.14%  |
| FeCoO <sub>x</sub> /BiVO <sub>4</sub> <sup>2</sup>                | 4.85 (pH 9.5)                                                                   | 0.4                                 | AM 1.5G, 100 mW cm <sup>-2</sup>                              | 1.16    | --     |
| CoBi/Electrochemic                                                | 3.2 (pH 9.5)                                                                    | 0.35                                | AM 1.5G, 100 mW cm <sup>-2</sup>                              | 1.1     | --     |

|                                                                          |               |      |                                  |      |      |
|--------------------------------------------------------------------------|---------------|------|----------------------------------|------|------|
| al- BiVO <sub>4</sub> <sup>3</sup>                                       |               |      |                                  |      |      |
| CoPi/Gradient<br>W:BiVO <sub>4</sub> <sup>4</sup>                        | 3.6 (pH 7.3)  | -    | AM 1.5G, 100 mW cm <sup>-2</sup> | -    | 4.9% |
| Co <sub>3</sub> O <sub>4</sub> /BiVO <sub>4</sub> <sup>5</sup>           | 2.71 (pH 7)   | 0.5  | AM 1.5G, 100 mW cm <sup>-2</sup> | -    | --   |
| Co-Pi/[001] BiVO <sub>4</sub> <sup>6</sup>                               | 6.1 (pH 7)    | 0.3  | AM 1.5G, 100 mW cm <sup>-2</sup> | -    | --   |
| CoPi/NiMoO <sub>4</sub> /BiV<br>O <sub>4</sub> <sup>7</sup>              | 5.3 (pH 6.4)  | 0.33 | AM 1.5G, 100 mW cm <sup>-2</sup> | 1.18 | --   |
| FeNi(OH) <sub>x</sub> /CoPy/Bi<br>VO <sub>4</sub> <sup>8</sup>           | 4.75 (--)     | -    | AM 1.5G, 100 mW cm <sup>-2</sup> | 1    | --   |
| CoPi/V <sub>13</sub> O <sub>16</sub> /<br>BiVO <sub>4</sub> <sup>9</sup> | 5 (pH 7)      | 0.37 | AM 1.5G, 100 mW cm <sup>-2</sup> | 1.55 | --   |
| NiCo-LDH/BiVO <sub>4</sub> <sup>10</sup>                                 | 3.4 (pH 7.3)  | 0.24 | AM 1.5G, 100 mW cm <sup>-2</sup> | 0.66 | --   |
| CoF <sub>2</sub> /BiVO <sub>4</sub> <sup>11</sup>                        | 5.1 (pH 7)    | 0.3  | AM 1.5G, 100 mW cm <sup>-2</sup> | 0.66 | --   |
| CoOOH/BiVO <sub>4</sub> <sup>12</sup>                                    | 4 (pH 7)      | 0.25 | AM 1.5G, 100 mW cm <sup>-2</sup> | --   | --   |
| CoLa-LDH/ BiVO <sub>4</sub> <sup>13</sup>                                | 2.7 (pH 7)    | 0.19 | AM 1.5G, 100 mW cm <sup>-2</sup> | 0.4  | --   |
| CoFe-H/BiVO <sub>4</sub> <sup>14</sup>                                   | 2.48 (pH 7)   | 0.23 | AM 1.5G, 100 mW cm <sup>-2</sup> | --   | --   |
| NiO/CoOx/BiVO <sub>4</sub> <sup>15</sup>                                 | 3.5 (pH 7)    | 0.3  | AM 1.5G, 100 mW cm <sup>-2</sup> | --   | --   |
| CoAl-LDH/Mo:<br>BiVO <sub>4</sub> <sup>16</sup>                          | 5.8 (pH 9.5)  | 0.26 | AM 1.5G, 100 mW cm <sup>-2</sup> | 1.87 | --   |
| CoSn-LDH/GQDs/<br>BiVO <sub>4</sub> <sup>17</sup>                        | 4.15 (pH 11)  | 0.42 | AM 1.5G, 100 mW cm <sup>-2</sup> | 1.26 | --   |
| CoMoO <sub>4</sub> /BiVO <sub>4</sub> <sup>18</sup>                      | 3 (pH 6.8)    | 0.4  | AM 1.5G, 100 mW cm <sup>-2</sup> | --   | --   |
| N-CoFeOx/BiVO <sub>4</sub> <sup>19</sup>                                 | 4.83 (pH 9.7) | 0.36 | AM 1.5G, 100 mW cm <sup>-2</sup> | --   | --   |
| CoPi/WTi-BiVO <sub>4</sub> <sup>20</sup>                                 | 2.4 (pH 7)    | 0.32 | AM 1.5G, 100 mW cm <sup>-2</sup> | --   | --   |

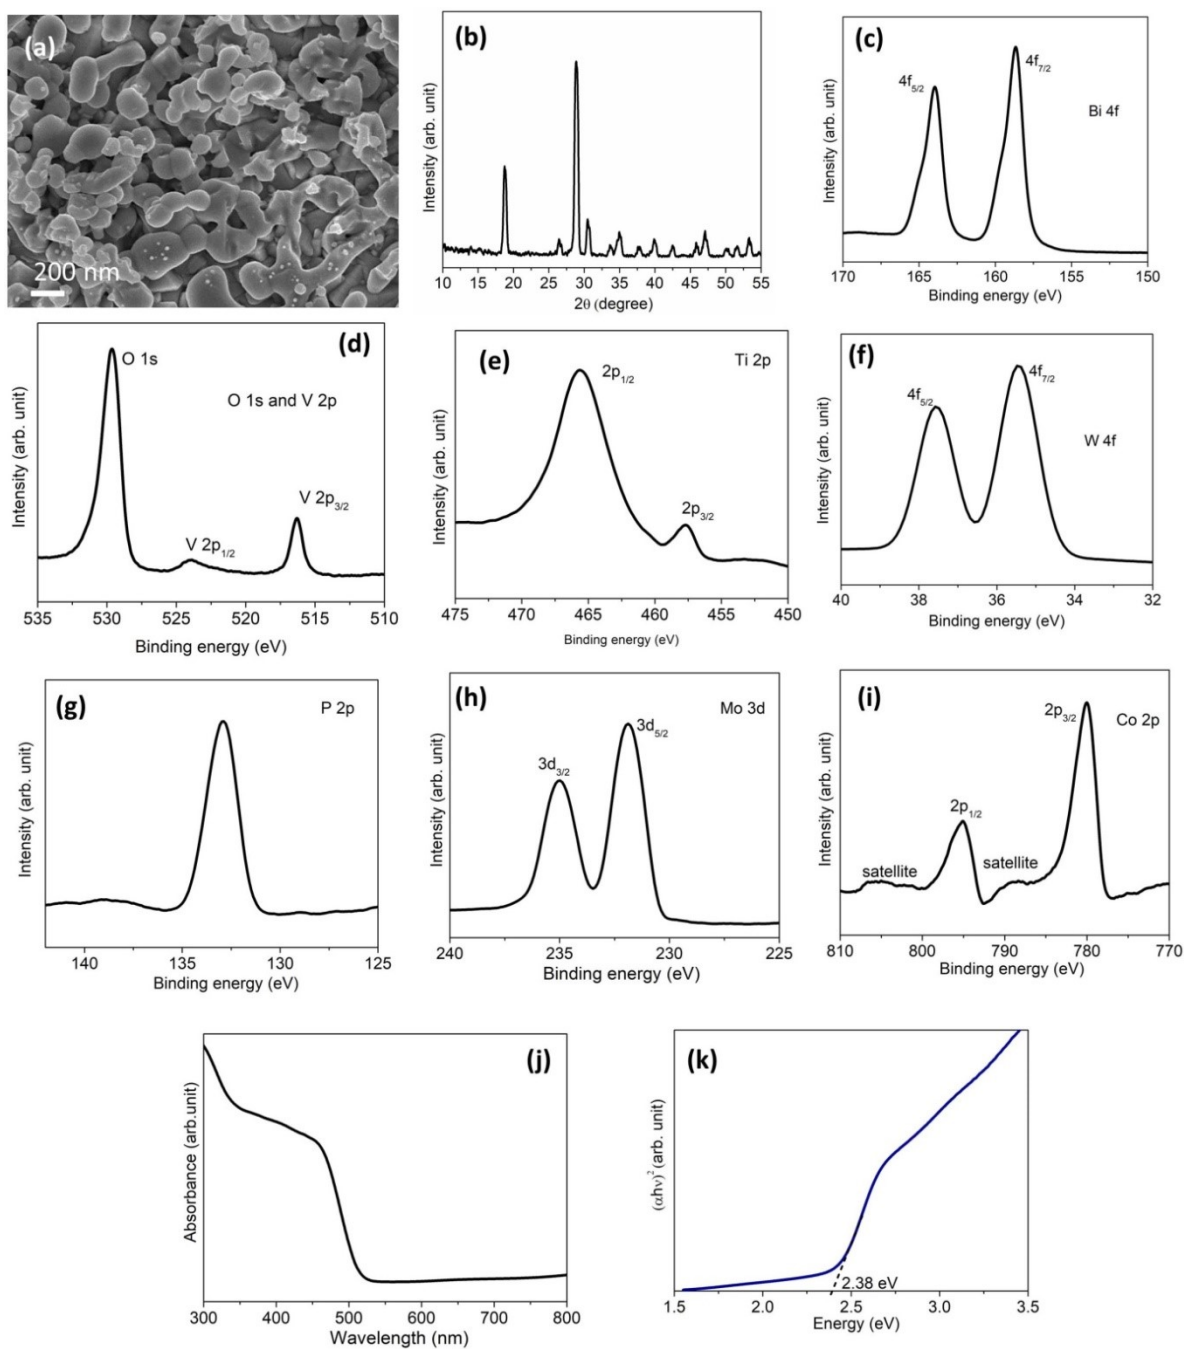

**Figure S15.** Characterization of the  $\text{MoCoO}_x/\text{TiWP-BiVO}_4$  photoanode after 6 h of operation in the PV-PEC tandem device configuration: (a) FESEM image, (b) XRD pattern, XPS spectra of (c) Bi 4f, (d) V 2p and O 1s, (e) Ti 2p, (f) W 4f, (g) P 2p, (h) Mo 3d, and (i) Co 2p. The (j) UV-vis absorption spectrum and the (k) Kubelka-Munk plot.

## References

- 1 X. Liang, P. Wang, F. Tong, X. Liu, C. Wang, M. Wang, Q. Zhang, Z. Wang, Y. Liu, Z. Zheng, Y. Dai and B. Huang, *Adv Funct Materials*, 2021, **31**, 2008656.
- 2 S. Wang, T. He, J. Yun, Y. Hu, M. Xiao, A. Du and L. Wang, *Adv Funct Materials*, 2018, **28**, 1802685.

- 3 S. Wang, P. Chen, J. Yun, Y. Hu and L. Wang, *Angewandte Chemie*, 2017, **129**, 8620–8624.
- 4 F. F. Abdi, L. Han, A. H. M. Smets, M. Zeman, B. Dam and R. Van De Krol, *Nat Commun*, 2013, **4**, 2195.
- 5 X. Chang, T. Wang, P. Zhang, J. Zhang, A. Li and J. Gong, *J. Am. Chem. Soc.*, 2015, **137**, 8356–8359.
- 6 H. S. Han, S. Shin, D. H. Kim, I. J. Park, J. S. Kim, P.-S. Huang, J.-K. Lee, I. S. Cho and X. Zheng, *Energy Environ. Sci.*, 2018, **11**, 1299–1306.
- 7 L. Gao, F. Li, H. Hu, X. Long, N. Xu, Y. Hu, S. Wei, C. Wang, J. Ma and J. Jin, *ChemSusChem*, 2018, **11**, 2502–2509.
- 8 X. Ning, B. Lu, Z. Zhang, P. Du, H. Ren, D. Shan, J. Chen, Y. Gao and X. Lu, *Angew Chem Int Ed*, 2019, **58**, 16800–16805.
- 9 H. Ren, T. Dittrich, H. Ma, J. N. Hart, S. Fengler, S. Chen, Y. Li, Y. Wang, F. Cao, M. Schieda, Y. H. Ng, Z. Xie, X. Bo, P. Koshy, L. R. Sheppard, C. Zhao and C. C. Sorrell, *Advanced Materials*, 2019, **31**, 1807204.
- 10 H. She, P. Yue, X. Ma, J. Huang, L. Wang and Q. Wang, *Applied Catalysis B: Environmental*, 2020, **263**, 118280.
- 11 B. Zhang, L. Chou and Y. Bi, *Applied Catalysis B: Environmental*, 2020, **262**, 118267.
- 12 F. Tang, W. Cheng, H. Su, X. Zhao and Q. Liu, *ACS Appl. Mater. Interfaces*, 2018, **10**, 6228–6234.
- 13 M. Chhetri, S. Dey and C. N. R. Rao, *ACS Energy Lett.*, 2017, **2**, 1062–1069.
- 14 W. Liu, H. Liu, L. Dang, H. Zhang, X. Wu, B. Yang, Z. Li, X. Zhang, L. Lei and S. Jin, *Adv Funct Materials*, 2017, **27**, 1603904.
- 15 M. Zhong, T. Hisatomi, Y. Kuang, J. Zhao, M. Liu, A. Iwase, Q. Jia, H. Nishiyama, T. Minegishi, M. Nakabayashi, N. Shibata, R. Niishiro, C. Katayama, H. Shibano, M. Katayama, A. Kudo, T. Yamada and K. Domen, *J. Am. Chem. Soc.*, 2015, **137**, 5053–5060.
- 16 Y. Zhong, C. Wu, X. Jia, S. Sun, D. Chen, W. Yao, H. Ding, J. Zhang and T. Ma, *Chemical Engineering Journal*, 2023, **465**, 142893.
- 17 S. Alam and M. Qureshi, *J. Phys. Chem. Lett.*, 2021, **12**, 8947–8955.
- 18 J. Du, X. Zhong, H. He, J. Huang, M. Yang, G. Ke, J. Wang, Y. Zhou, F. Dong, Q. Ren and L. Bian, *ACS Appl. Mater. Interfaces*, 2018, **10**, 42207–42216.
- 19 J. Lin, X. Han, S. Liu, Y. Lv, X. Li, Y. Zhao, Y. Li, L. Wang and S. Zhu, *Applied Catalysis B: Environmental*, 2023, **320**, 121947.

20X. Zhao, J. Hu, B. Wu, A. Banerjee, S. Chakraborty, J. Feng, Z. Zhao, S. Chen, R. Ahuja, T. C. Sum and Z. Chen, *J. Mater. Chem. A*, 2018, **6**, 16965–16974.
